# Supplementary material for: Snowflake-like Metastable Wurtzite CuGaS2/MoS2 Composite with Superior Electrochemical HER Activity
Source: PubMed Central journal article supplement — ACS Omega. 2022 Nov 25;7(48):43883–93. doi: 10.1021/acsomega.2c05116 (PMC9730465; doi:10.1021/acsomega.2c05116), 2022-11-25
Supplement: ao2c05116_si_001.pdf [file ao2c05116_si_001.pdf]

## Electronic Supplementary Information

**Snowflake like metastable wurtzite CuGaS<sub>2</sub>/MoS<sub>2</sub> composite with superior electrochemical HER activity**

**Jagan Radhakrishnan<sup>a</sup>, Abdul Kareem<sup>b</sup>, Srabanti Ratna<sup>a</sup>, Sellappan Senthilkumar<sup>b</sup>, Krishnendu Biswas<sup>a\*</sup>**

<sup>a</sup>Chemistry Division, School of Advanced Sciences, Vellore Institute of Technology, Chennai 600127, India

<sup>b</sup>Department of Chemistry, School of Advanced Sciences, Vellore Institute of Technology, Vellore, 632014, India

\*Corresponding Author Email: krishnendu.biswas@vit.ac.in, krismat79@gmail.com

We have simulated the diffraction pattern for wurtzite CuGaS<sub>2</sub> using the Diamond software and the crystal parameters are given in **Table S1**. The obtained simulated diffraction pattern is shown as the red line pattern in **Figure 1**.

**Table S1.** Crystal parameters of wurtzite CuGaS<sub>2</sub>

| Atom | Wyck. | x/a | y/b | z/c   |
|------|-------|-----|-----|-------|
| Cu   | 2b    | 1/3 | 2/3 | 0     |
| Ga   | 2b    | 1/3 | 2/3 | 0     |
| S    | 2b    | 1/3 | 2/3 | 0.375 |

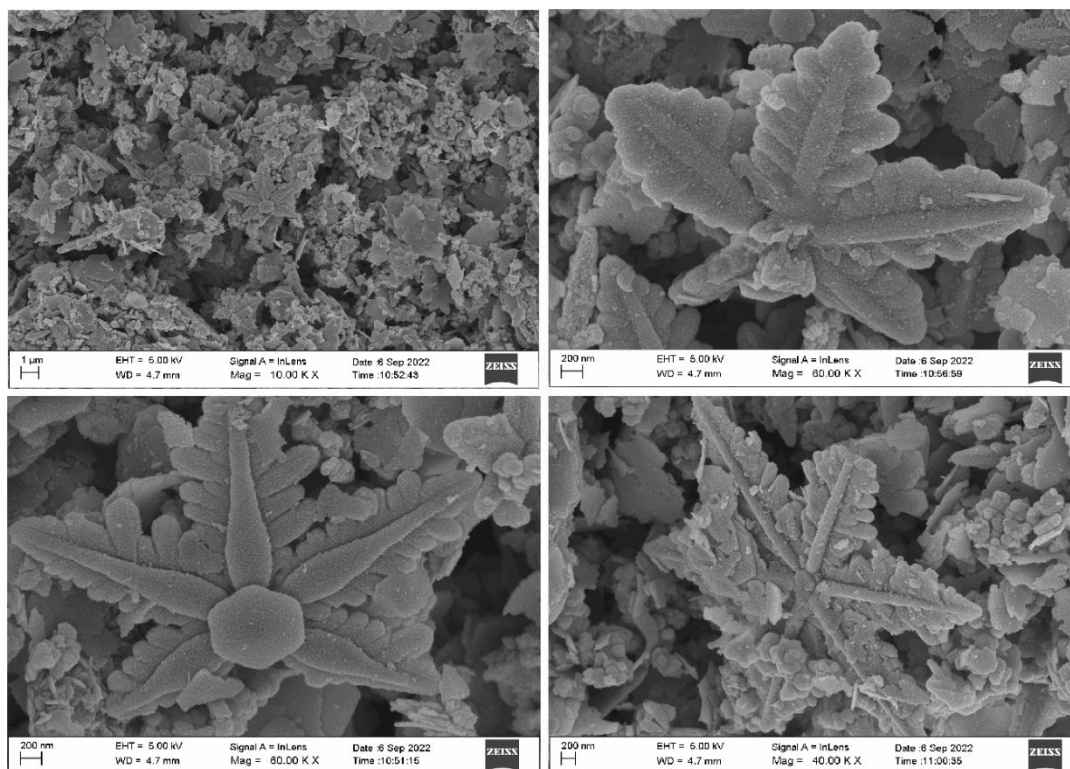

**Figure S1.** FESEM images of  $\text{CuGaS}_2/7\%\text{MoS}_2$  at different magnifications.

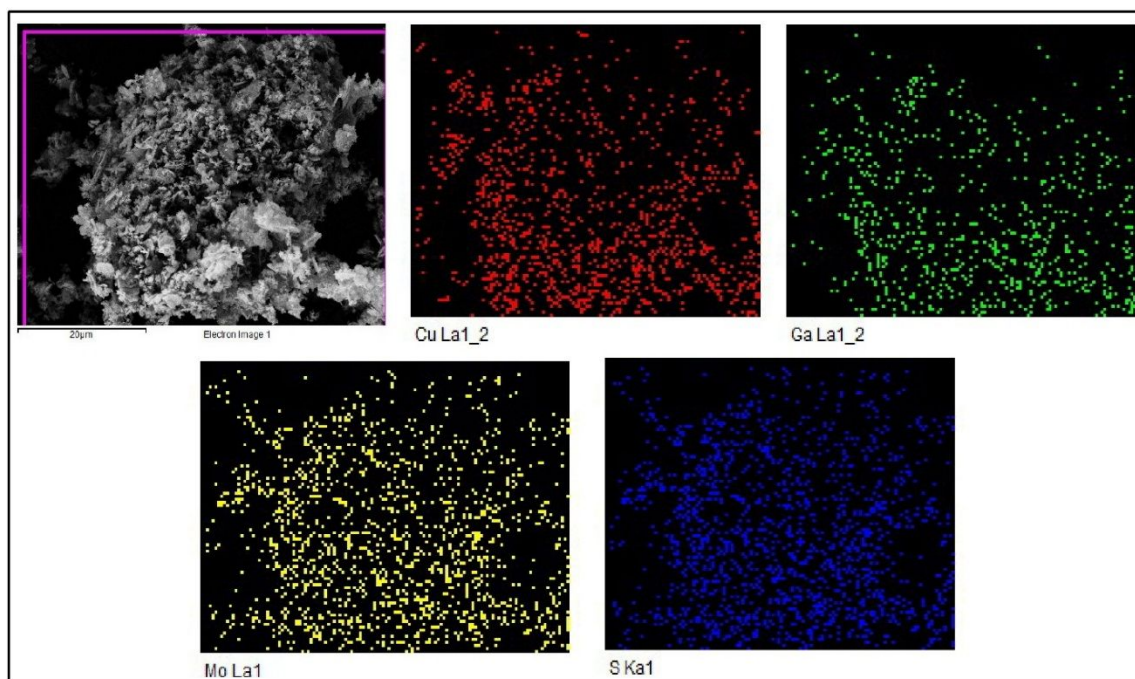

**Figure S2.** Elemental mapping images of  $\text{CuGaS}_2/7\%\text{MoS}_2$  composite.

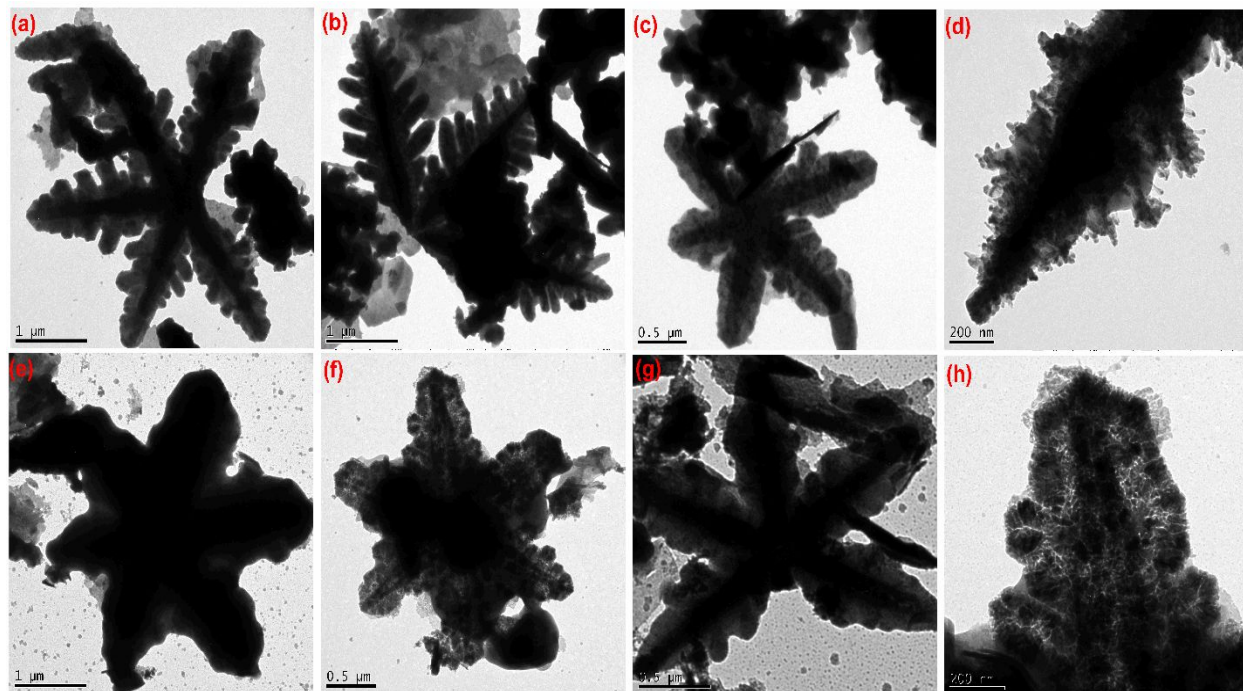

**Figure S3.** TEM image of CuGaS<sub>2</sub> (a, b, c, d) and CuGaS<sub>2</sub>/7%MoS<sub>2</sub> (e, f, g, h) in different magnifications.

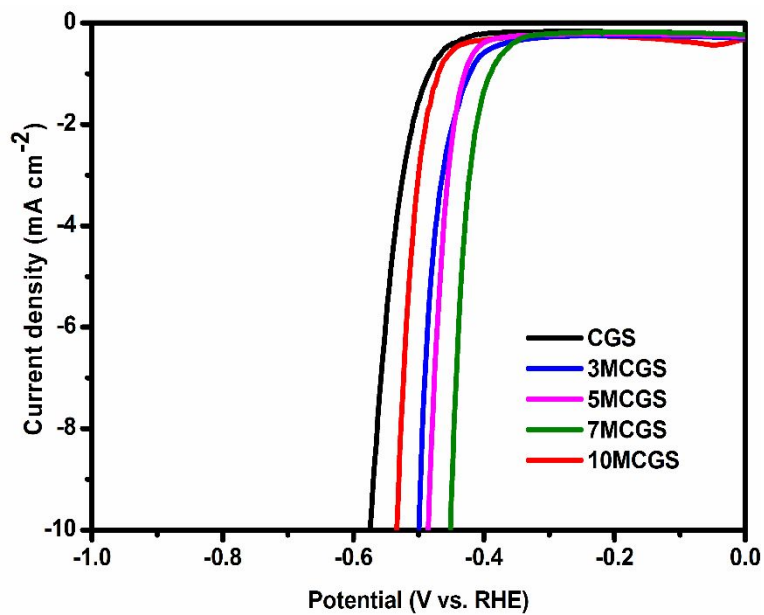

**Figure S4.** iR-corrected LSV curves of CGS, 3MCGS, 5MCGS, 7MCGS, and 10MCGS for HER in 0.5 M H<sub>2</sub>SO<sub>4</sub>.

The iR corrected LSV curves shown in **Figure S4** indicate that the catalyst 7MCGS have slightly increased overpotential value (~13 mV) attributed to the iR drop.

### **Calculation of Electrical double layer capacitance (*Cdl*) and ECSA**

Electrochemical active surface area (ECSA) of CuGaS<sub>2</sub>/xMoS<sub>2</sub> (x=0,3,5,7,10%wt) catalysts was estimated from their electric double layer capacitance (*Cdl*). The double layer capacitance value was measured from the non-Faradaic potential region of the CV curves at different scan rates 50 mV s<sup>-1</sup> to 10 mV s<sup>-1</sup> in 0.5 M H<sub>2</sub>SO<sub>4</sub>. Their anodic and cathodic current densities measured at the middle potential from CV scans were linearly fitted with the CV scan rates to obtain Slope<sub>anodic</sub> and Slope<sub>cathodic</sub>, respectively.

*Cdl* was calculated by  $Cdl = (\text{Slope}_{\text{anodic}} - \text{Slope}_{\text{cathodic}})/2$  --- (1)

ECSA was then calculated by dividing the electric double layer capacitance value (*Cdl*) by the specific surface capacitance (*Cs*) of the electrode surface.

$ECSA = Cdl / Cs$  --- (2)

Since the exact value of *Cs* for CuGaS<sub>2</sub> is not available, a commonly used *Cs* value (0.04 mF cm<sup>-2</sup>) for metal surfaces was used in this study.<sup>1,2</sup>

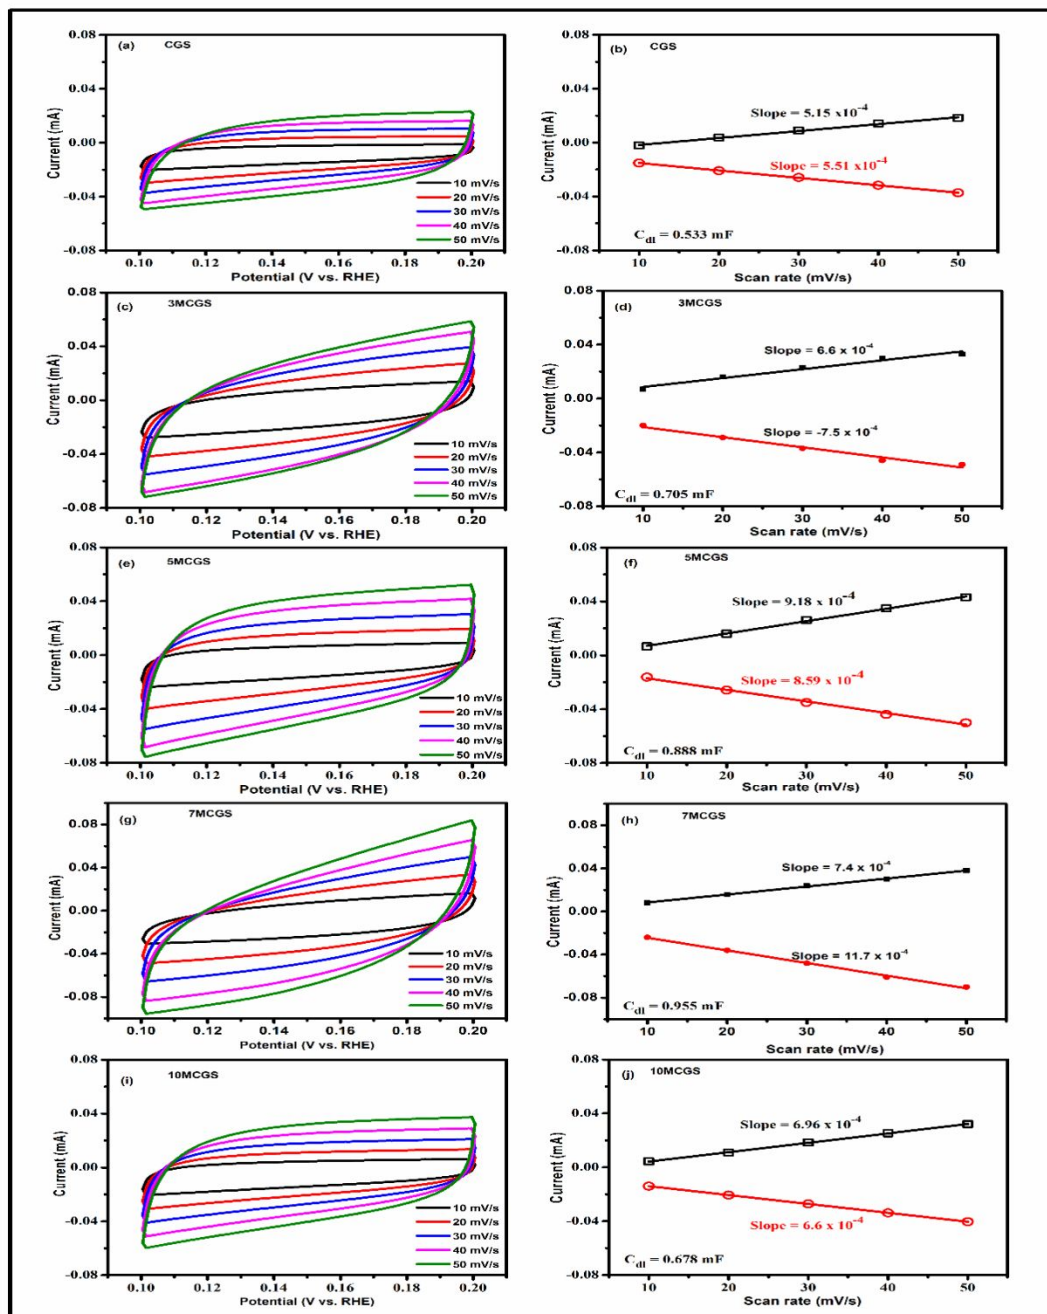

**Figure S5.** CV curves (a, c, e, g, i) at a non-faradic area in 0.5 M H<sub>2</sub>SO<sub>4</sub> at the scan rates of 10, 20, 30, 40 and 50 mV s<sup>-1</sup> and capacitive currents plotted as a function of the scan rate (b, d, f, h, j) of the CGS, 3MCGS, 5MCGS, 7MCGS, 10MCGS electrodes.

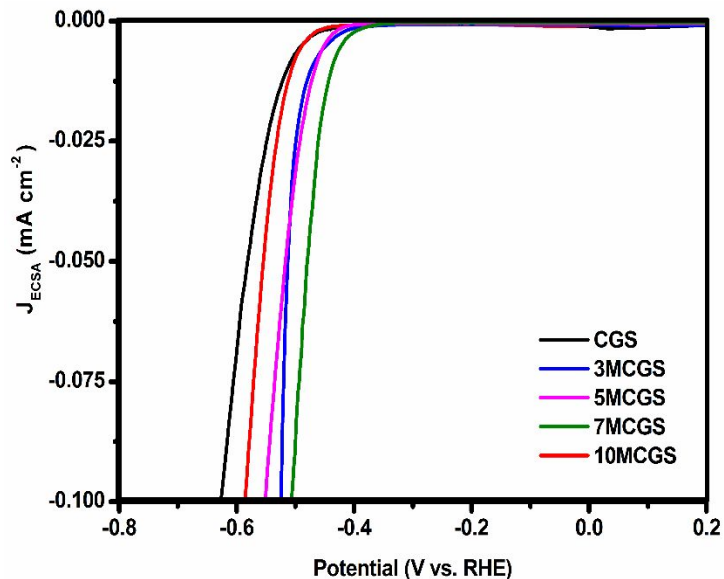

**Figure S6.** LSV curves of CGS, 3MCGS, 5MCGS, 7MCGS, and 10MCGS normalized by calculated ECSA.

**Calculation procedure for TOF:**

$$TOF = JA/2nF$$

J is current density at particular overpotential in ( $A\ cm^{-2}$ ), J at 400 mV

A is surface area of the working electrode ( $0.07\ cm^2$ )

F is Faradays constant value 96485 C/mol

$\frac{1}{2}$  is used as HER is a two electron reaction

n is the number of moles of the catalyst loaded on the working electrode

**Table S2** Calculated TOF of catalysts

| Catalyst | TOF                   |
|----------|-----------------------|
| CGS      | $4.7 \times 10^{-4}$  |
| 3MCGS    | $9.2 \times 10^{-4}$  |
| 5MCGS    | $6.2 \times 10^{-4}$  |
| 7MCGS    | $19.6 \times 10^{-4}$ |
| 10MCGS   | $5.6 \times 10^{-4}$  |

**Table S3.** Comparison for RhB adsorption performance of different sulfide based adsorbents.

| S. No | Adsorbent                                                   | Dye concentration (mg/L) | Catalyst amount | Time (min) | Adsorption capacity (mg g <sup>-1</sup> ) | Percentage of adsorption | Ref           |
|-------|-------------------------------------------------------------|--------------------------|-----------------|------------|-------------------------------------------|--------------------------|---------------|
| 1     | Fe <sub>3</sub> O <sub>4</sub> /MoS <sub>2</sub> composites | 20                       | 20              | 30         | 24                                        | -                        | 3             |
| 2     | SnS <sub>2</sub> /MoS <sub>2</sub> NPs                      | 10                       | 20              | 15         | 23.6                                      | 92                       | 4             |
| 3     | Flower-like MoS <sub>2</sub> nanostructures                 | 20                       | 20              | 35         | 49.2                                      | 91                       | 5             |
| 4     | Ni/MoS <sub>2</sub> nanocomposites                          | 20                       | 10              | 35         | 15.7                                      | -                        | 6             |
| 5     | MoS <sub>2</sub> nanosheets                                 | 20                       | 100             | 5          | 19.6                                      | 97.96                    | 7             |
| 6     | Flower-like MoS <sub>2</sub> nanostructure                  | 10                       | 10              | 180        | 59                                        | 98.5                     | 8             |
| 7     | Snowflake like CuGaS <sub>2</sub>                           | 10                       | 30              | 20         | 15                                        | 90                       | Present study |
|       |                                                             |                          |                 | 60         | 16.5                                      | 99                       |               |

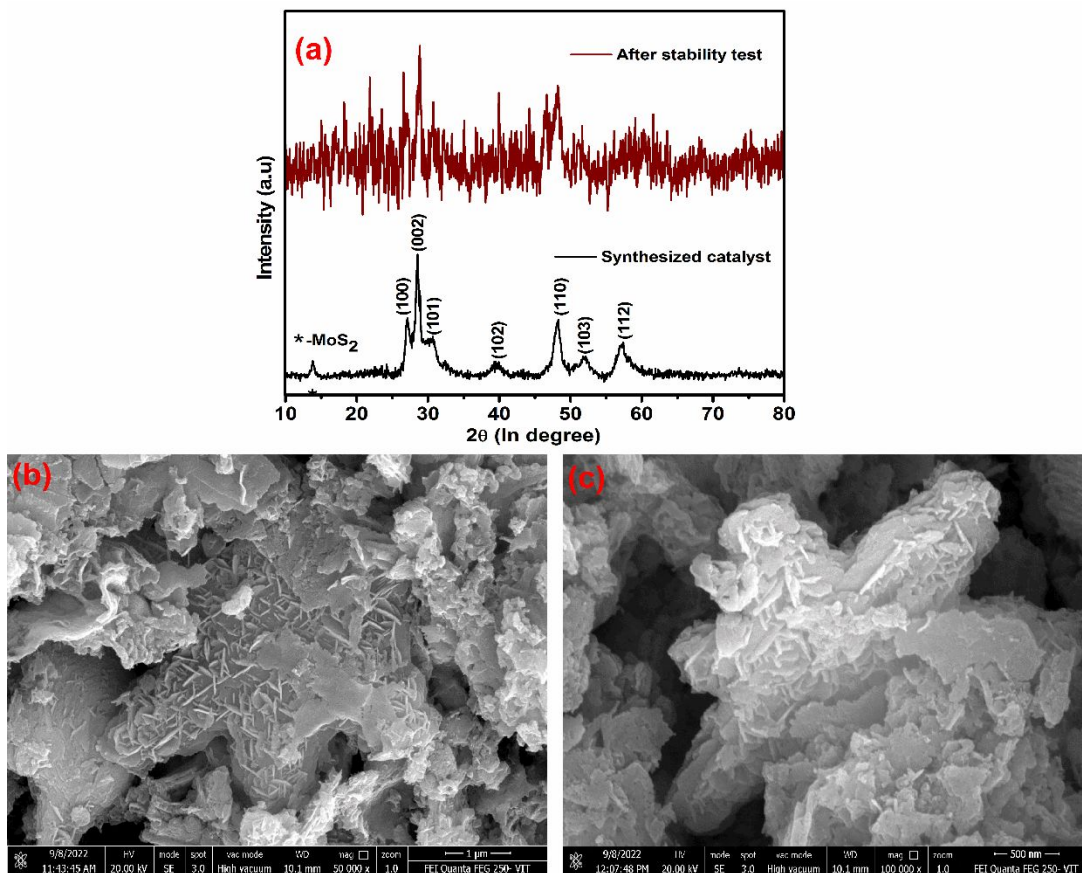

**Figure S7.** XRD patterns before and after HER activity (a), FESEM (b, c) after HER activity of 7MCGS.



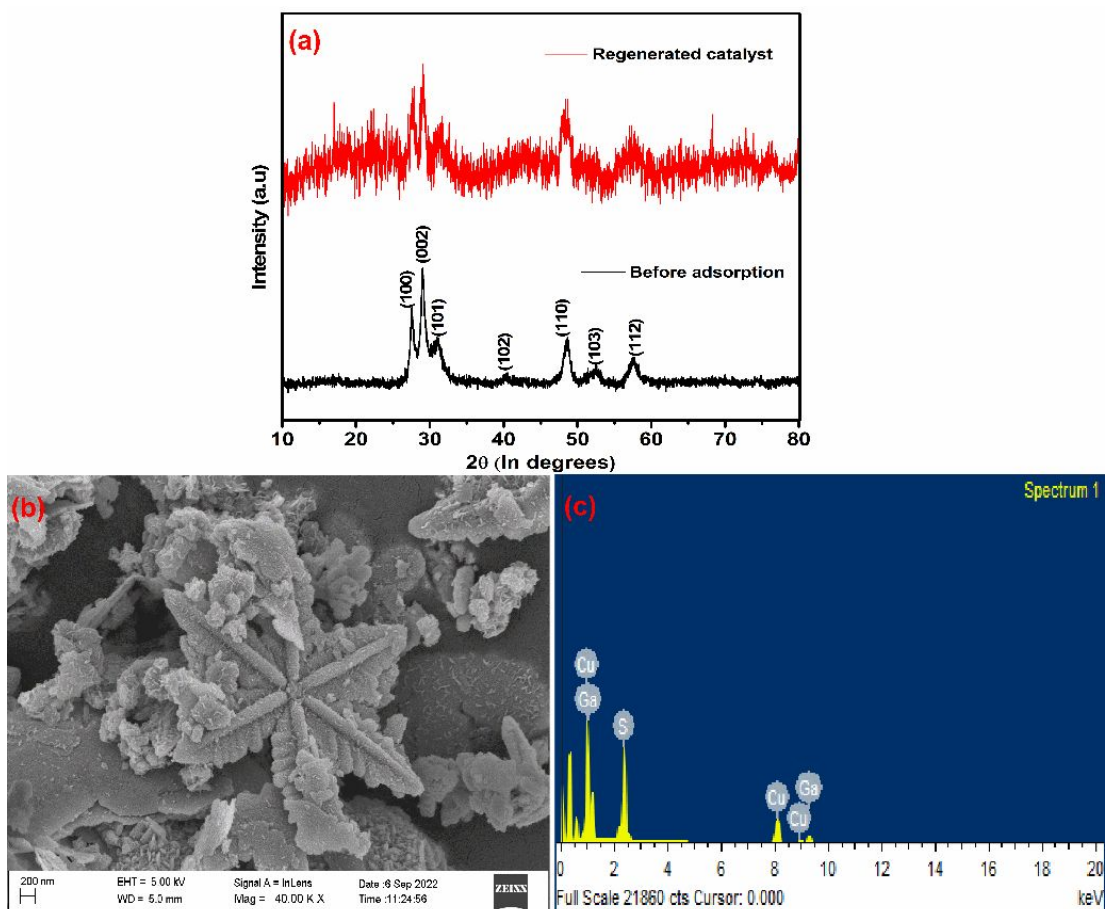

**Figure S8.** XRD patterns before and after RhB adsorption (a), FESEM image (b) and EDAX (c) after RhB adsorption of  $\text{CuGaS}_2$ .

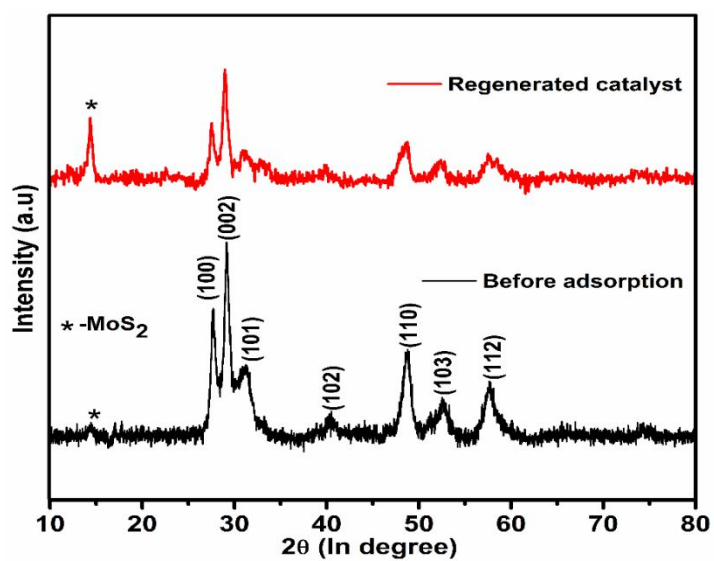

**Figure S9.** XRD patterns before and after RhB adsorption of  $\text{CuGaS}_2/5\%\text{MoS}_2$ .

## References

- (1) Zhou, Z.; Wei, L.; Wang, Y.; Karahan, H.E.; Chen, Z.; Lei, Y.; Chen, X.; Zhai, S.; Liao, X.; Chen, Y. Hydrogen evolution reaction activity of nickel phosphide is highly sensitive to electrolyte pH. *J. Mater. Chem. A* **2017**, *5*, 20390-20397.
- (2) Cao, X.; Medvedeva, J.E.; Nath, M. Copper cobalt selenide as a high-efficiency bifunctional electrocatalyst for overall water splitting: combined experimental and theoretical study. *ACS Appl. Energy Mater.* **2020**, *3*, 3092-3103.
- (3) Song, H.J.; You, S.; Jia, X.H.; Yang, J. MoS<sub>2</sub> nanosheets decorated with magnetic Fe<sub>3</sub>O<sub>4</sub> nanoparticles and their ultrafast adsorption for wastewater treatment. *Ceram. Int.* **2015**, *41*, 13896-13902.
- (4) Cui, B.; Wang, Y.; Zhang, F.; Xiao, X.; Su, Z.; Dai, X.; Zhang, H.; Huang, S. Hydrothermal synthesis of SnS<sub>2</sub>/MoS<sub>2</sub> Nanospheres for enhanced adsorption capacity of organic dyes. *Mater. Res. Express* **2019**, *7*, 015016.
- (5) Wang, X.; Ding, J.; Yao, S.; Wu, X.; Feng, Q.; Wang, Z.; Geng, B. High supercapacitor and adsorption behaviors of flower-like MoS<sub>2</sub> nanostructures. *J. Mater. Chem. A* **2014**, *2*, 15958-15963.
- (6) Song, H.; You, S.; Jia, X. A facile in situ reduction method for the preparation of magnetic Ni/MoS<sub>2</sub> nanocomposites and their adsorption behaviors of congo red. *J. Mater. Sci.: Mater. Electron.* **2016**, *27*, 10841-10848.
- (7) Li, H.; Xie, F.; Li, W.; Fahlman, B.D.; Chen, M.; Li, W. Preparation and adsorption capacity of porous MoS<sub>2</sub> nanosheets. *RSC Adv.* **2016**, *6*, 105222-105230.

- (8) Han, S.; Liu, K.; Hu, L.; Teng, F.; Yu, P.; Zhu, Y. Superior adsorption and regenerable dye adsorbent based on flower-like molybdenum disulfide nanostructure. *Sci. Rep.* **2017**, *7*, 1-11.
